# Supplementary material for: Exceptional Heterogeneity in Viral Evolutionary Dynamics Characterises Chronic Hepatitis C Virus Infection
Source: PubMed Central journal article supplement (PMC5025083; doi:10.1371/journal.ppat.1005894), 2016-09-15

a) HCV untreated

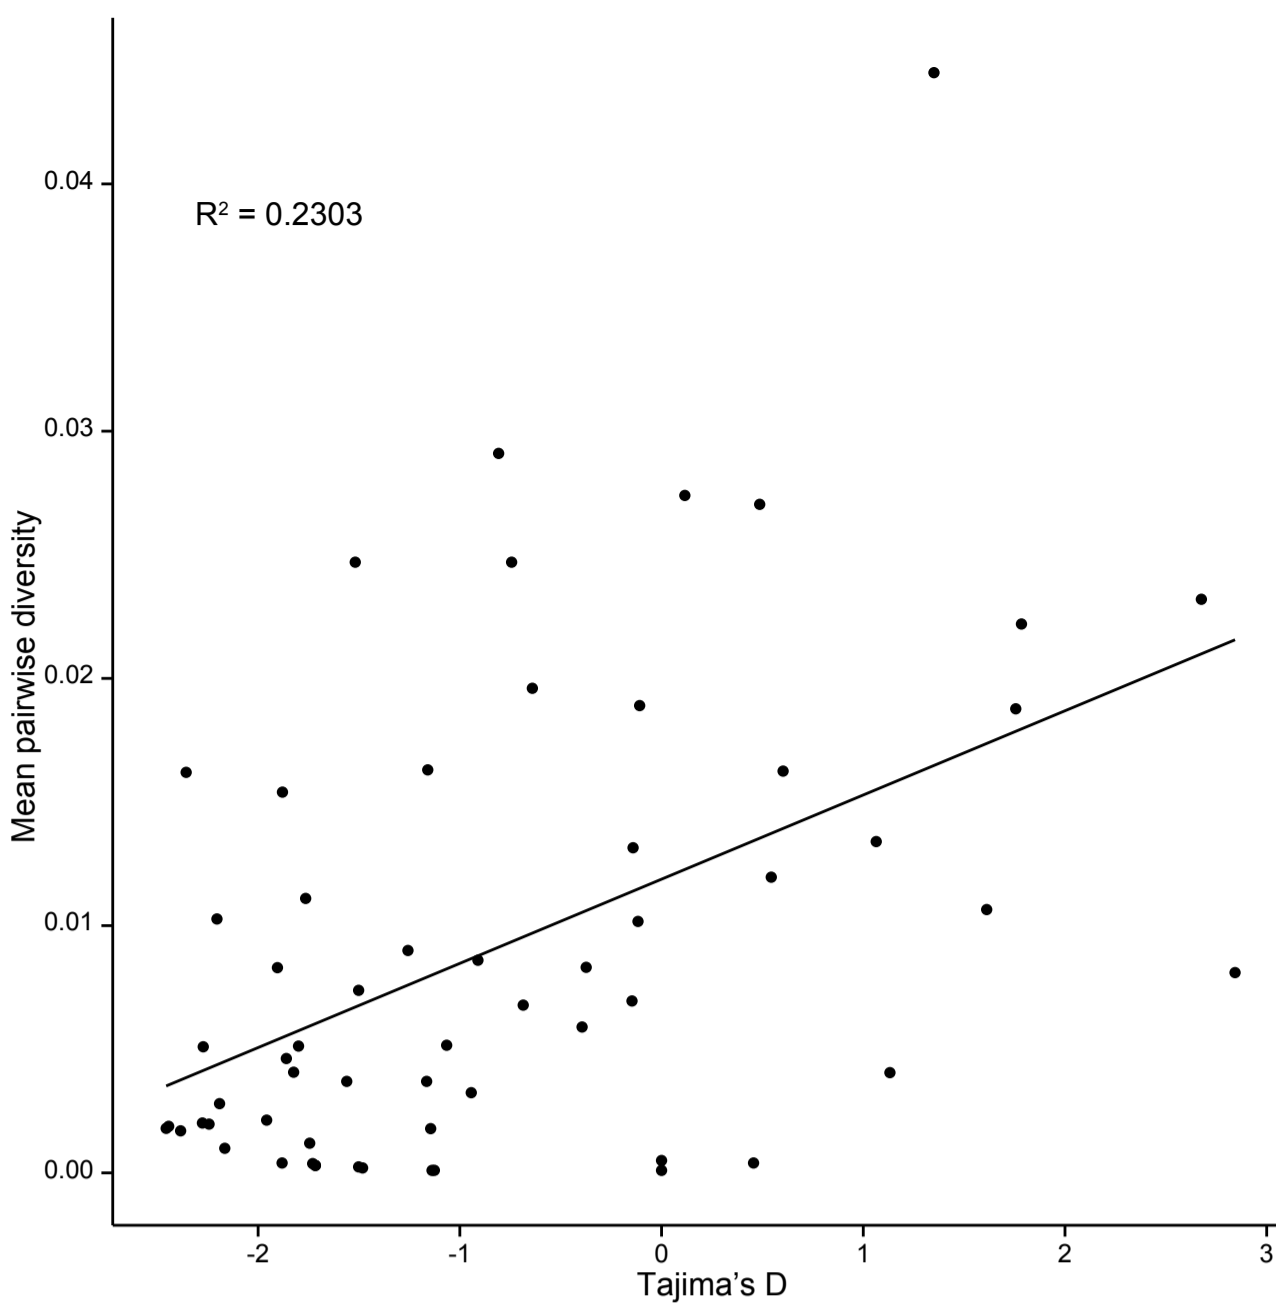

b) HCV treated

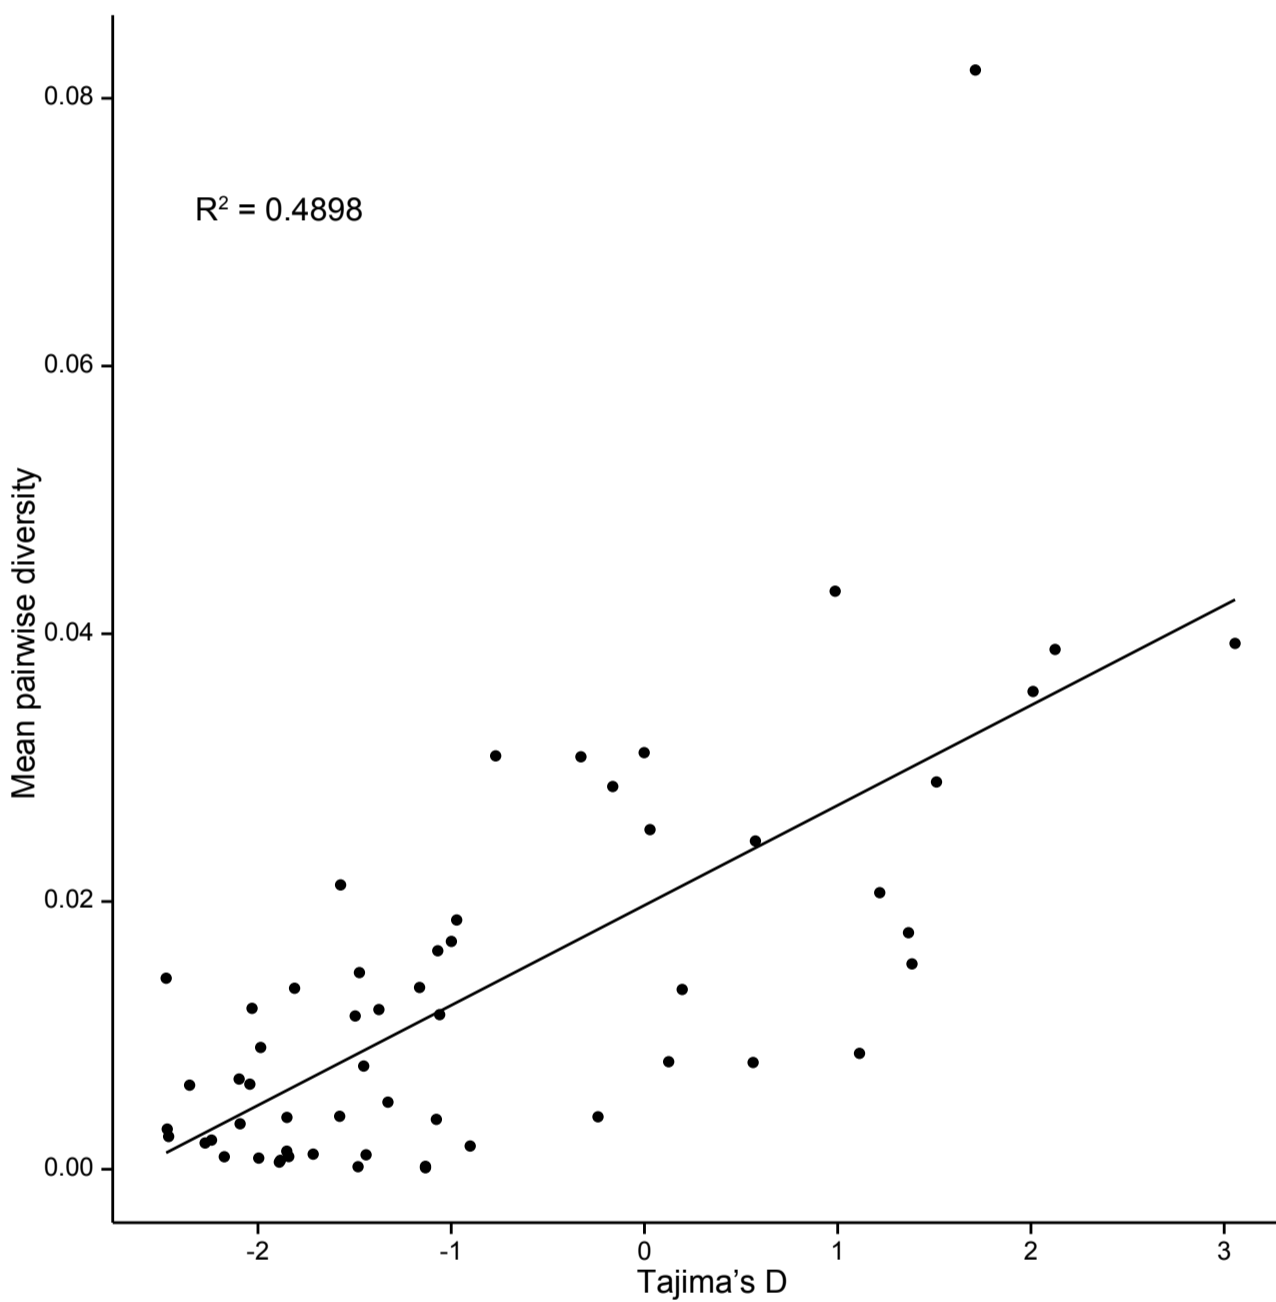

c) HIV

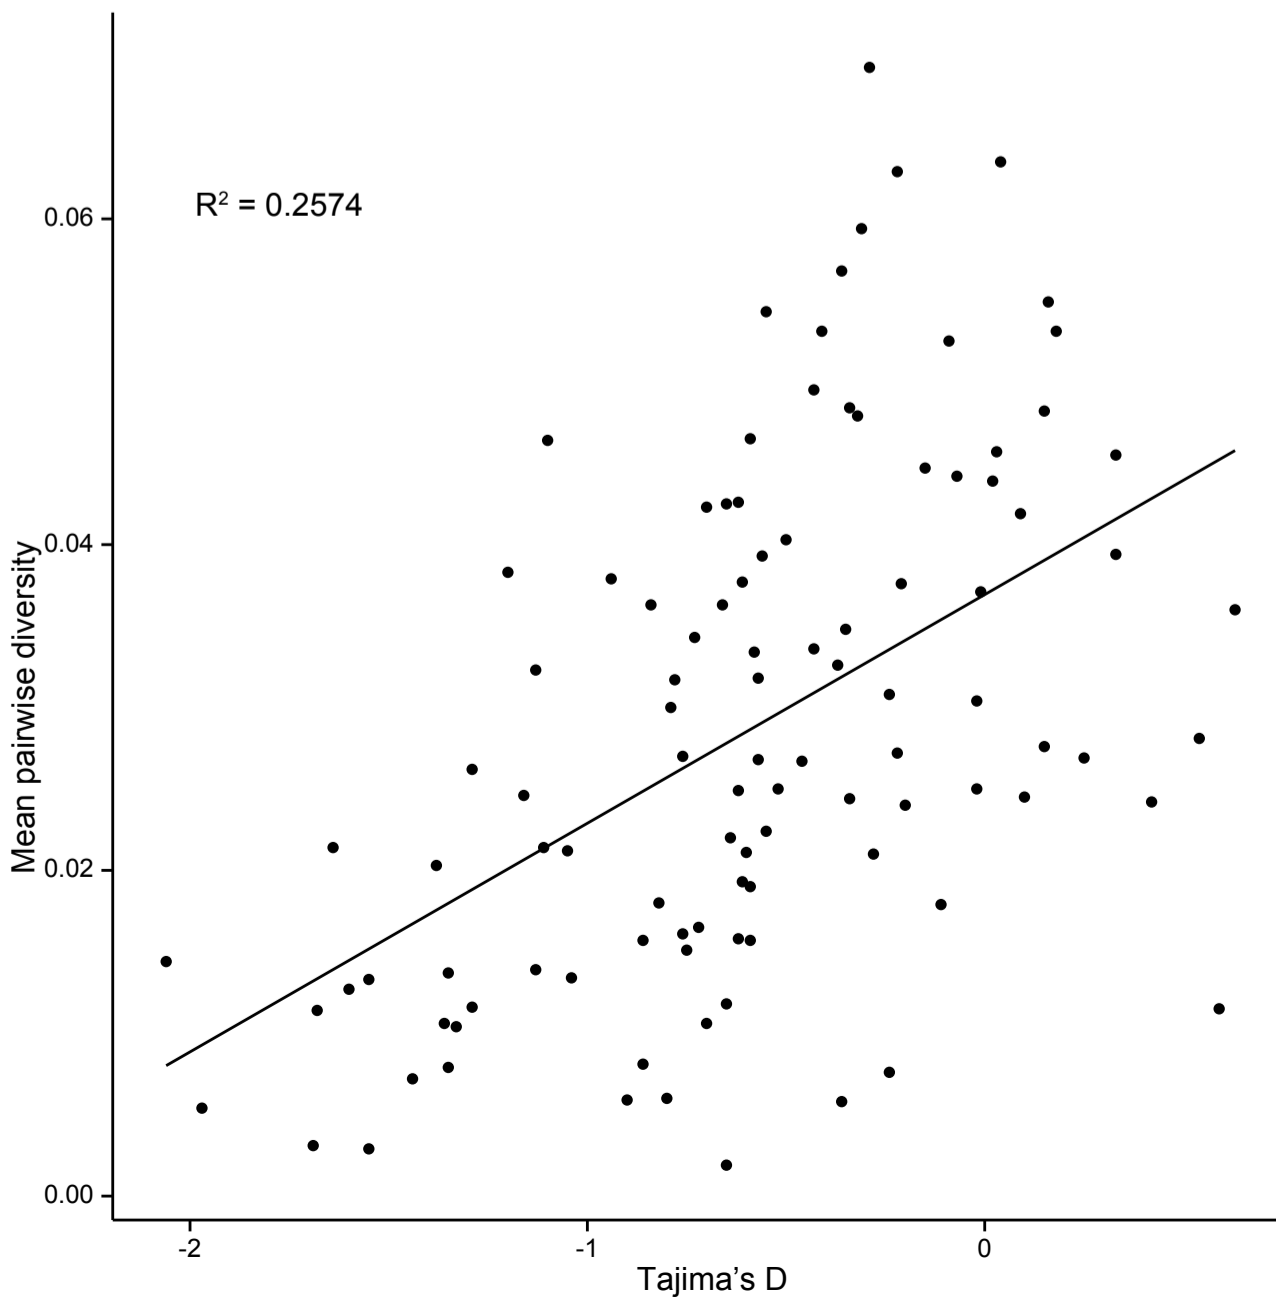

Supplement: ppat.1005894.s002.pdf [file ppat.1005894.s002.pdf]
